# Supplementary material for: Very stable and high-quantum-yield phosphor Na2BaSr(PO4)2:Eu2+ for plant growth LEDs
Source: Royal Society of Chemistry journal article supplement (doi:10.1039/d1qm00671a), 2021-01-01
Supplement: d1qm00671a1.pdf [file d1qm00671a1.pdf]

## Supporting Information

### Superior Stable and High Quantum Yield Phosphor $\text{Na}_2\text{BaSr}(\text{PO}_4)_2$ :

#### $\text{Eu}^{2+}$ for Plant Growth LEDs

Jinmeng Xiang<sup>a</sup>, Xiaoqi Zhao<sup>b</sup>, Hao Suo<sup>a</sup>, Minkun Jin<sup>a</sup>, Xue Zhou<sup>a</sup>, Changheng Chen<sup>a</sup>,  
Chongfeng Guo<sup>a\*</sup>

*a* State Key Laboratory of Photon-Technology in Western China Energy, Institute of Photonics & Photon-Technology, Northwest University, Xi'an 710069, China;

*b* School of Physics and Opto-Electronic Technology, Baoji University of Arts and Sciences, Baoji, Shaanxi, 721016, People's Republic of China;

\* Author to whom correspondence should be addressed

E-mail: [guocf@nwu.edu.cn](mailto:guocf@nwu.edu.cn) (Prof. Guo)

Tel & Fax: ±86-29-88302661

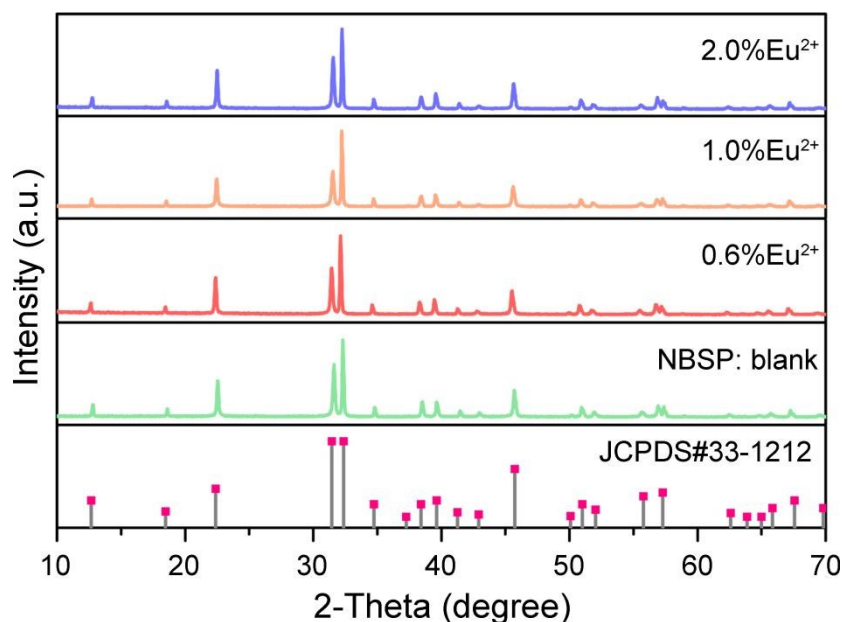

**Figure S1.** Powder XRD patterns of NBSP:  $x\%\text{Eu}^{2+}$  ( $x = 0, 0.6, 1.0, 2.0$ ) together with standard profile of NBSP host (JCPDS#33-1212).

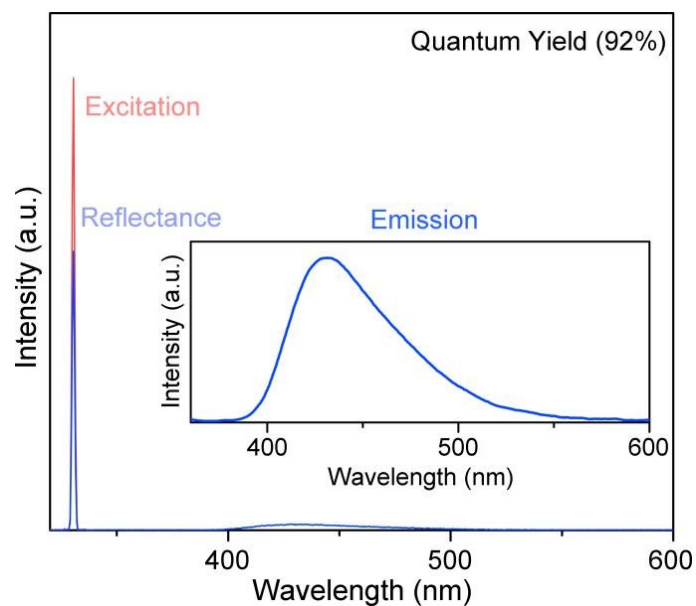

**Figure S2.** The quantum yield of NBSP: 1%Eu<sup>2+</sup>.

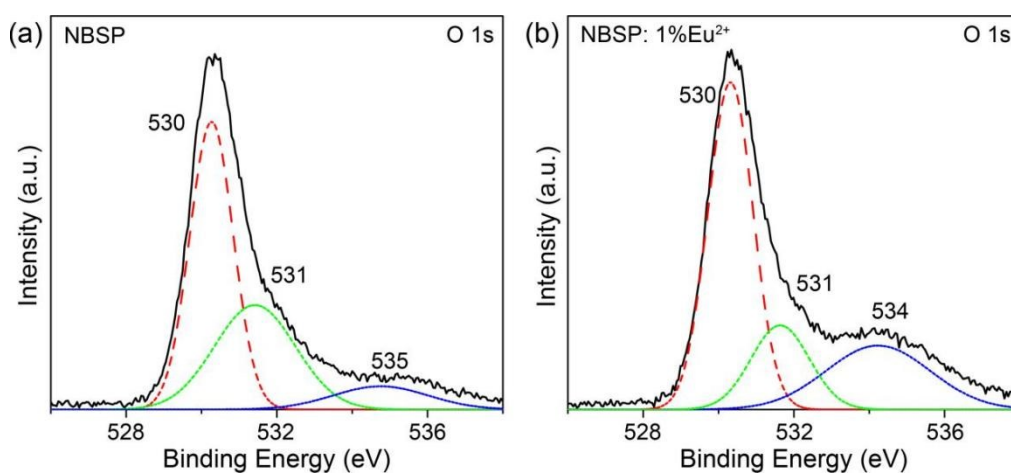

**Figure S3.** The high resolution XPS of O1s in NBSP and NBSP: 1%Eu<sup>2+</sup>.

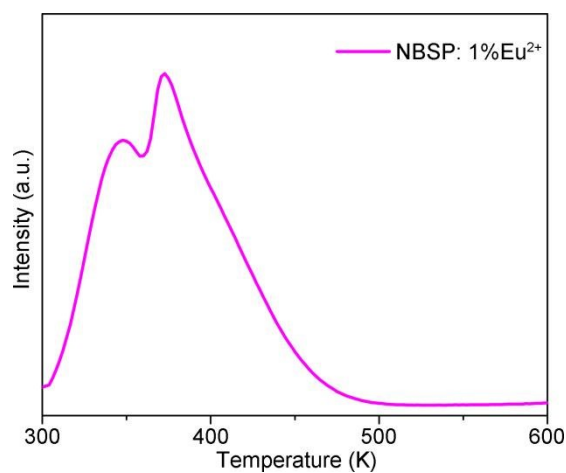

**Figure S4.** (a) The thermoluminescence (TL) spectrum of the 1%Eu<sup>2+</sup>-doped NBSP.

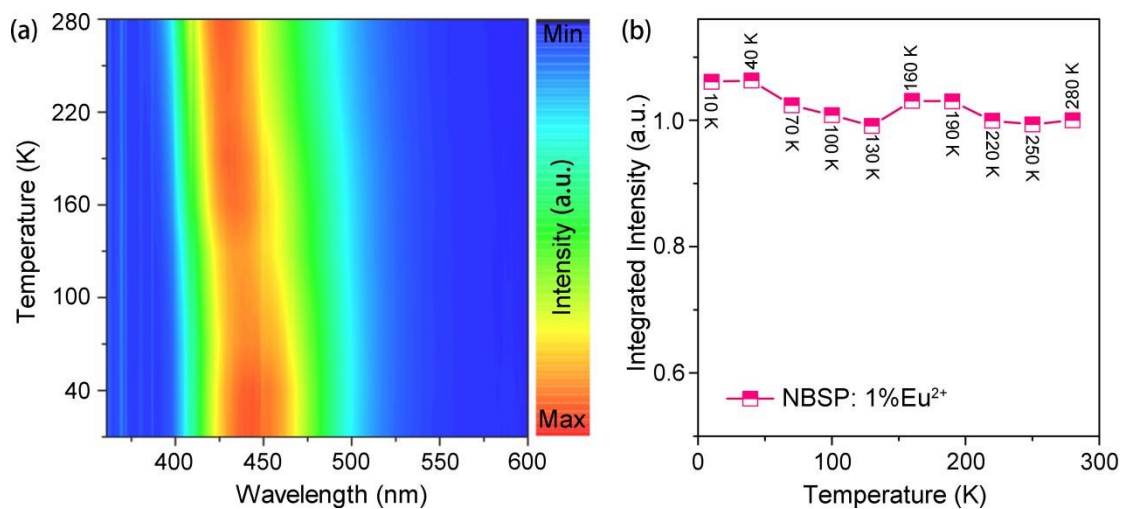

**Figure S5.** The two-dimension temperature-dependent emission spectrum from 10 to 280 K of 1%Eu<sup>2+</sup> doped NBSP.

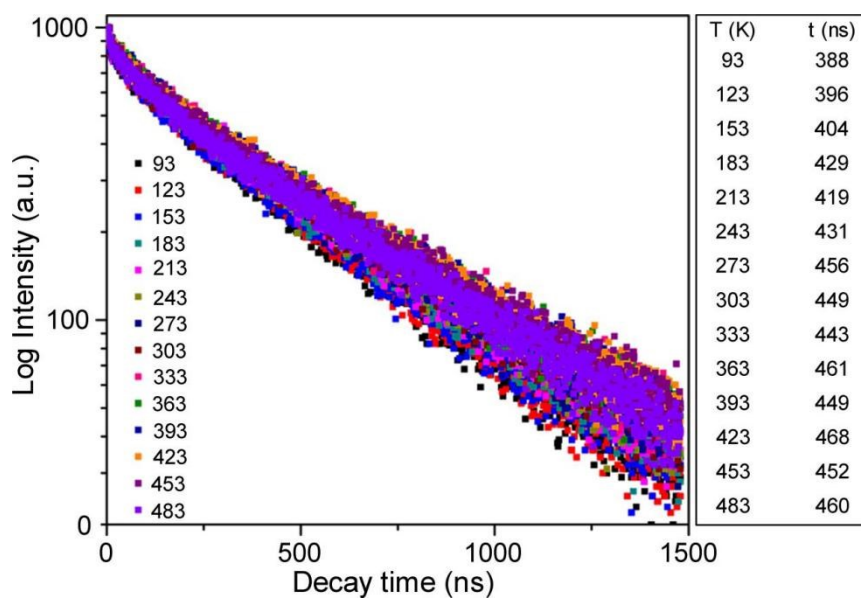

**Figure S6.** The temperature-dependent decay curves and lifetime of the 1%Eu<sup>2+</sup>-doped NBSP.

**Table S1.** The ionic radius ( $r$ ) of the  $\text{Ba}^{2+}$ ,  $\text{Sr}^{2+}$ ,  $\text{Na}^+$  and  $\text{Eu}^{2+}$  atoms with different coordination numbers (CN).

| Ionic            | CN | $r$ (Å) |
|------------------|----|---------|
| $\text{Ba}^{2+}$ | 6  | 1.35    |
| $\text{Sr}^{2+}$ | 6  | 1.18    |
|                  | 7  | 1.21    |
|                  | 10 | 1.36    |
| $\text{Na}^+$    | 6  | 1.02    |
|                  | 7  | 1.12    |
|                  | 9  | 1.24    |
| $\text{Eu}^{2+}$ | 6  | 1.17    |
|                  | 7  | 1.20    |
|                  | 10 | 1.35    |

**Table S2.** The sites and their chemical composition in NBSP.

| Site       | Chemical Composition     |
|------------|--------------------------|
| Ba/Sr1     | Ba: 0.480; Sr: 0.520     |
| Sr2/Na1    | Sr: 0.580; Na: 0.420     |
| Sr3/Na2    | Sr: 0.190; Na: 0.810     |
| Na3        | Na: 1.000                |
| P1/vacancy | P: 0.760; vacancy: 0.240 |
| P2         | P: 1.000                 |
| O1/vacancy | O: 0.800; vacancy: 0.200 |
| O2         | O: 1.000                 |
| O3/vacancy | O: 0.800; vacancy: 0.200 |
| O4         | O: 1.000                 |
